# Supplementary material
Source: Springer Nature journal article supplement (https://www.springermedizin.de/resource/supplementary/13041_2014_288_MOESM5_ESM.pdf/25657918)

Infants (0-2yr) vs Adults (20-49yr)  
Human DLPFC (GSE13564)

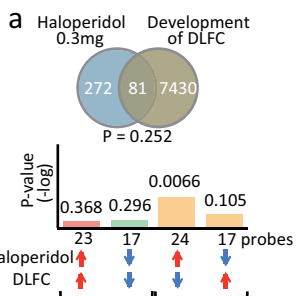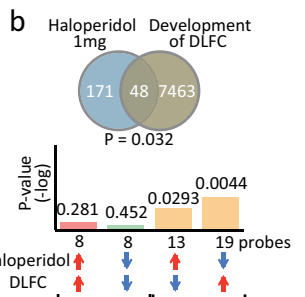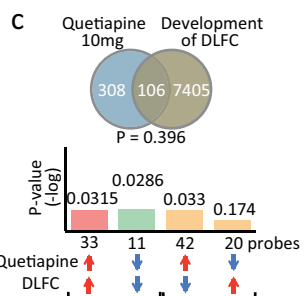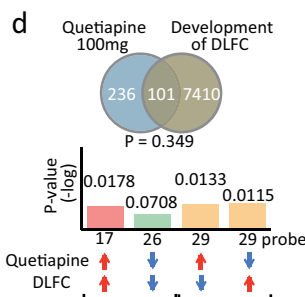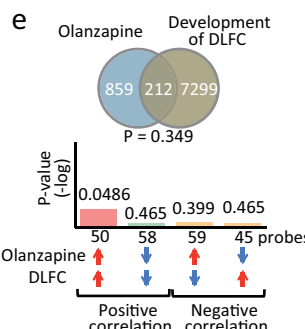

Infants (1-5yr) vs Adults (20-39yr)  
Human DLPFC (GSE25219)

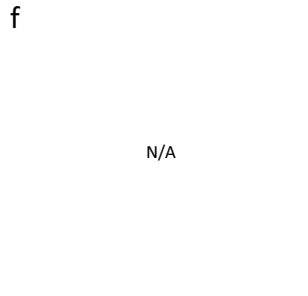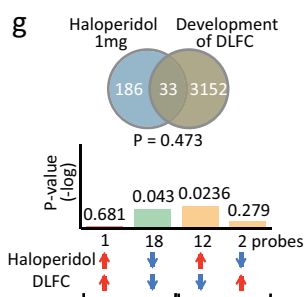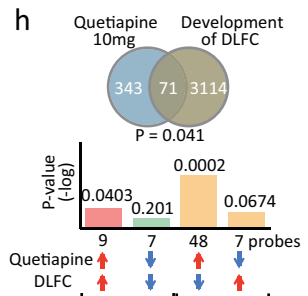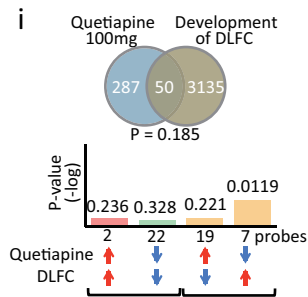

Infants (1-5yr) vs Adults (20-39yr)  
Human MFC (GSE25219)

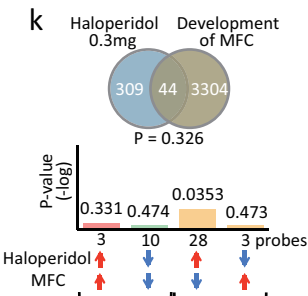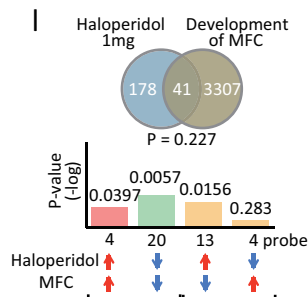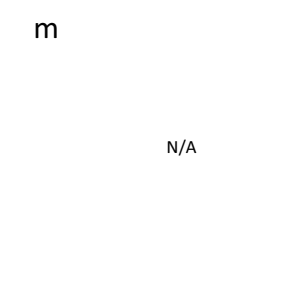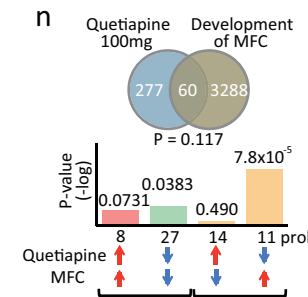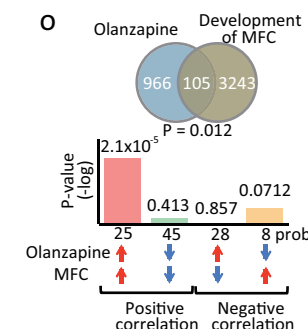

Supplement: MOESM5 [file 25657918]
